# Supplementary material for: Predisposing Conditions for Condylar Luxation After Intraoral Vertical Ramus Osteotomy&nbsp;
Source: Research Square preprint supplement (doi:10.21203/rs.3.rs-132750/v1), 2021-01-04
Supplement: Supplementary file 1 [file 98085cf4f9909eab133354e9.xlsx]

## Sheet: Sheet1
	Table 2. Factors related to TMD sag or luxation (univariate analysis)
	Variable	Category	TMJ sag or luxation (-)	TMJ sag or luxation (+)	P-value
	Sex	female	48	24	0.322
		male	24	18
	Age		26.7±10.8	28.0±9.99	0.538
	Side	non-functional side	35	22	0.846
		functional side	37	42
	TMJ symptoms	(-)	55	20	0.002
		(+)	17	22
	Maxillary surgery	(-)	42	20	0.331
		(+)	30	22
	Setback (mm)		6.61±3.32	4.42±3.64	0.001
	With occlusal cant correction	(-)	58	28	0.117
		(+)	14	14
	With occlusal cant correction (2 mm or more)	(-)	62	28	0.018
		(+)	10	14
	Method of bone incision	c-shaped	34	16	0.064
		vertical	17	5
		oblique	21	21
	Mandibular condyle deformation	(-)	72	30	<0.001
		(+)	0	12
	Values are expressed as mean±standard deviation or the number of patients
	TMD, temporomandibular disorder; TMJ, temporomandibular joint
